I again propose that the major hypothesis that nephrotoxicity is agent-specific, occurs primarily because of intrarenal fluoride ion production, and is not primarily dependent on fluoride ion plasma concentration is impressive.<sup>6</sup> It underscores the rule that medicine can never rest on its laurels<sup>1</sup>: minds should remain open, vigilance should be maintained, and new data should be continually sought.

Anesthesiology  
83:234-235, 1995  
© 1995 American Society of Anesthesiologists, Inc.  
Lippincott-Raven Publishers

Tinker and Baker claim that we "suggest, without proposing any mechanism, that the small amount of fluoride produced *in* the kidney is relevant to nephrotoxicity, whereas the large amount of serum fluoride that passes *through* the kidney for excretion is irrelevant." There is no such statement in our paper, and furthermore, there are no data on which to argue the point. Renal parenchymal fluoride

1. Brown BR Jr: Shibboleths and jigsaw puzzles (editorial). ANESTHESIOLOGY 82:607-608, 1995
2. Kharasch ED, Hankins DC, Thummel KE: Human kidney methoxyflurane and sevoflurane metabolism: Intrarenal fluoride production as a possible mechanism of methoxyflurane nephrotoxicity. ANESTHESIOLOGY 82:689-699, 1995
3. Gessner BD, Beller M, Middaugh JP, Whitford GM: Acute fluoride poisonings from a public water system. N Engl J Med 330:95-99, 1994
4. Carpenter RL, Eger EI II, Johnson BH, Unadkat JD, Sheiner LB: The extent of metabolism of inhaled anesthetics in humans. ANESTHESIOLOGY 65:201-205, 1986
5. Kharasch ED, Karol MD, Lanni C, Sawchuk R: Clinical sevoflurane metabolism and disposition: I. Sevoflurane and metabolite pharmacokinetics. ANESTHESIOLOGY 82:1369-1378, 1995
6. Shiraishi Y, Ikeda K: Uptake and biotransformation of sevoflurane in humans: A comparative study of sevoflurane with halothane, enflurane, and isoflurane. J Clin Anesth 2:381-386, 1990

Methoxyflurane nephrotoxicity is intimately and unquestionably related to biotransformation. Methoxyflurane is biotransformed to a number of metabolites. Identification of fluoride as the nephrotoxic metabolite was based on associations between serum fluoride concentration and toxicity in humans; on correlations between changes in metabolism, serum fluoride concentrations, and nephrotoxicity in rats; and on the ability of fluoride (at unknown serum concentrations) to cause toxicity in animals. However, data in humans establishing a causal link between increased serum fluoride concentrations and nephrotoxicity of methoxyflurane or any other anesthetic has never been published. The clinical observations about enflurane, isoflurane, and sevoflurane cited above are pertinent. They call into question the appropriateness of applying a fluoride hypothesis developed to explain methoxyflurane nephrotoxicity nonselectively to

1. Mazze RI, Woodruff RM, Heerdt JC. Fluoride metabolism and defluorination in humans. *ANESTHESIA* 1981; 36: 103-107.
2. Murray JM, Trinick TR. Plasma fluoride levels during anesthesia and after prolonged anesthesia: A comparison of halothane and fluorane. *Anesth Analg* 74: 286-290 (1992).

## CORRESPONDENCE

all anesthetics without supporting data. We seek to understand the basic mechanisms of anesthetic nephrotoxicity in the post-methoxyflurane era.

We presented experimental results that human kidneys can metabolize volatile anesthetics. We presented a hypothesis that intrarenal anesthetic metabolism may contribute to nephrotoxicity. All the associative data for methoxyflurane metabolism and toxicity are congruent with such a hypothesis. Formation of another nephrotoxic metabolite with fluoride, whether hepatically or renally, would be congruent with the associative data for methoxyflurane metabolism and toxicity. This, too, would be a hypothesis.

We carefully presented these new hypotheses as such, not as conclusions. We look forward to the rigorous testing and confirmation or refutation of these, or other hypotheses, toward the goal of elucidating the mechanism(s) of volatile anesthetic nephrotoxicity. We hope the editorial by Brown<sup>11</sup> and the letter from Tinker and Baker will draw attention to this issue and stimulate further investigation.

**Evan D. Kharasch, M.D., Ph.D.**

**Douglas Hankins, M.A.**

**Kenneth Thummel, Ph.D.**

Department of Anesthesiology, RN-10  
University of Washington School of Medicine  
Seattle, Washington 98195

## References

1. Mazze RI, Woodruff RE, Heerdt ME: Isoniazid-induced enflurane defluorination in humans. *ANESTHESIOLOGY* 57:5-8, 1982
2. Murray JM, Trinick TR: Plasma fluoride concentrations during and after prolonged anesthesia: A comparison of halothane and isoflurane. *Anesth Analg* 74:236-240, 1992

3. Spencer EM, Willatts SM, Prys-Roberts C: Plasma inorganic fluoride concentrations during and after prolonged (>24 hr) isoflurane sedation: Effect on renal function. *Anesth Analg* 73:731-737, 1991

4. Arnold JH, Truog RD, Rice SA: Prolonged administration of isoflurane to pediatric patients during mechanical ventilation. *Anesth Analg* 76:520-526, 1993

5. Kobayashi Y, Ochiai R, Takeda J, Sekiguchi H, Fukushima K: Serum and urinary inorganic fluoride concentrations after prolonged inhalation of sevoflurane in humans. *Anesth Analg* 74:753-757, 1992

6. Higuchi H, Satoh T, Arimura S, Kanno M, Endoh R: Serum inorganic fluoride levels in mildly obese patients during and after sevoflurane anesthesia. *Anesth Analg* 77:1018-1021, 1993

7. Frink EJ Jr, Malan TP Jr, Isner J, Brown EA, Morgan S, Brown BR Jr: Renal concentrating function with prolonged sevoflurane or enflurane anesthesia in volunteers. *ANESTHESIOLOGY* 80:1019-1025, 1994

8. Bito H, Ikeda K: Plasma inorganic fluoride and intracircuit degradation product concentrations in long-duration, low-flow sevoflurane anesthesia. *Anesth Analg* 79:946-951, 1994

9. Mazze RI, Calverley RK, Smith NT: Inorganic fluoride nephrotoxicity: Prolonged enflurane and halothane anesthesia in volunteers. *ANESTHESIOLOGY* 46:265-271, 1977

10. Selinsky BS, Perlman ME, London RE: *In vivo* nuclear magnetic resonance studies of hepatic methoxyflurane metabolism: II. A re-evaluation of hepatic metabolic pathways. *Mol Pharmacol* 33:567-573, 1988

11. Brown BR Jr: Shibboleths and jigsaw puzzles (editorial). *ANESTHESIOLOGY* 82:607-608, 1995

(Accepted for publication April 29, 1995.)
